# Supplementary material for: Estimated HIV Incidence in the United States, 2006–2009
Source: PLoS One. 2011 Aug 3;6(8):e17502. doi: 10.1371/journal.pone.0017502 (PMC3149556; doi:10.1371/journal.pone.0017502)
Supplement: Table S2 — Group-level probability of testing for HIV within the BED recency period (P) based on the proportion of individuals diagnosed with AIDS at the time of HIV diagnosis (q). (XLSX) [file pone.0017502.s002.xlsx]

## Sheet: Sheet1
Table S2. Group-level probability of testing for HIV within the BED recency period (P) based on the proportion of individuals diagnosed with AIDS at the time of HIV diagnosis (q)
q	P		q	P		q	P		q	P		q	P
0.01	0.5745		0.11	0.19237		0.21	0.1196		0.31	0.08281		0.41	0.05945
0.02	0.45179		0.12	0.18171		0.22	0.11494		0.32	0.08004		0.42	0.05755
0.03	0.38267		0.13	0.17213		0.23	0.11055		0.33	0.07737		0.43	0.05571
0.04	0.33594		0.14	0.16348		0.24	0.10641		0.34	0.07482		0.44	0.05393
0.05	0.30133		0.15	0.1556		0.25	0.1025		0.35	0.07237		0.45	0.05221
0.06	0.27423		0.16	0.14838		0.26	0.0988		0.36	0.07001		0.46	0.05054
0.07	0.25218		0.17	0.14174		0.27	0.09528		0.37	0.06774		0.47	0.04892
0.08	0.23375		0.18	0.1356		0.28	0.09194		0.38	0.06556		0.48	0.04734
0.09	0.21802		0.19	0.12989		0.29	0.08875		0.39	0.06345		0.49	0.04581
0.1	0.20438		0.2	0.12457		0.3	0.08571		0.4	0.06142		0.5	0.04432
