# Supplementary material for: Estimated HIV Incidence in the United States, 2006–2009
Source: PLoS One. 2011 Aug 3;6(8):e17502. doi: 10.1371/journal.pone.0017502 (PMC3149556; doi:10.1371/journal.pone.0017502)
Supplement: Table S3 — Estimated diagnoses of HIV Infection, number BED tested, and estimated incidence of HIV infection in 16 states and 2 cities contributing data for analysis, 2006–2009. (XLSX) [file pone.0017502.s003.xlsx]

## Sheet: Sheet1
Table S3. Estimated Diagnoses of HIV Infection, Number BED Tested, and Estimated Incidence of HIV Infection in 16 Statesa and 2 Citiesb Contributing Data for Analysis, 2006-2009
		2006						2007						2008						2009
Characteristic		Diagnosesc	%	BED Testedd	%	Incidence	%	Diagnosesc	%	BED Testedd	%	Incidence	%	Diagnosesc	%	BED Testedd	%	Incidence	%	Diagnosesc	%	BED Testedd	%	Incidence	%
Totale		30702		6096		28800		31883		7615		33400		31357		8863		28900		31162		9615		28500
Sex	Male	22464	73.1	4364	71.6	20900	72.7843	23530	73.9	5446	71.7	24400	73	23263	74.4	6441	72.7	21000	72	23592	76	7206	75	21300	75
	Female	8238	26.9	1732	28.4	7900	27.2157	8353	26.1	2169	29	8900	27	8094	25.6	2422	27.3	8000	28	7570	24	2409	25	7300	25
Race/ethnicity	American Indian/Alaska Native	95	0.3	15	0.2	70	0.2	111	0.3	27	0.4	90	0.3	109	0.3	30	0.3	110	0.4	98	0.3	36	0.4	110	0.4
	Asian	293	1	60	1	350	1	389	1	71	0.9	530	2	399	1	96	1	480	2	378	1	109	1	460	2
	Black/African American	15270	50	3227	53.4	13700	46.829	15585	48.9	4104	54	15200	46	16028	50.8	4839	55.3	14400	50	15942	50.8	5152	54	13600	48
	Hispanic/Latinof	6200	20	1231	19.7	5600	19	6477	20.1	1460	18.5	6900	21.1506	6253	19.9	1645	19	5700	19.9145	6303	19.9	1855	19	5900	21
	Native Hawaiian/Other Pacific Islander	41	0.1	7	0.1	60	0.20128	29	0.1	6	0.1	70	0.184194	22	0.1	6	0.1	20	0.0681473	24	0.1	6	0.1	50	0.2
	White	8398	27	1482	24	8700	30	8804	28.2	1839	24.4	10000	30.2654	8122	26	2116	23.8	7800	27	8052	26	2340	23.8	8200	29
	Multiple races	405	1.3	74	1	420	1	487	2	108	1	510	2	424	1	131	2	430	1	365	1	117	1	320	1
Age at infection (yr)	13–29	8689	28.1	2536	42	9300	32.0135	9403	30	3245	43	11900	35.7106	10003	32	3908	43.6	11200	38.5683	10426	34	4271	43.6	11300	40
	30–39	8527	27.7	1654	27.4	8700	30.4527	8324	26.2	1972	25.7	9900	30	7900	25.4	2202	25.1	8300	28.5104	7588	24	2308	24	7600	27
	40–49	8584	28.2	1331	21.8	7400	25.7111	8670	27	1557	20	7900	23.8128	8131	26.4	1787	20.3	6300	22.216	7795	25	1922	20.3	6400	23
	50–99	4903	16	575	9	3400	11.8227	5486	17.4	841	11.2	3700	11.066	5323	17.1	966	10.9	3100	10.7053	5354	17.1	1114	12	3200	10.7053
Transmission category	Male-to-male sexual contact	15233	50	3261	54	15100	53	16496	51.6	4016	52.8	18100	53.9832	16775	54	4979	56	15400	53.1239	17405	56	5606	58	16500	58
	Injection drug use	4061	13.1	592	9.8	3300	11	3809	12.1	680	9.2	3900	12.0503	3269	10	705	8	3100	10.7766	3079	10	743	8	2800	10
	Male-to-male sexual contact and Injection drug use	1054	3	178	3	1000	4	1003	3	242	3	1000	3	844	3	216	2	660	2	795	3	258	3	680	2
	Heterosexual contactg	10238	33	2060	34	9300	31.8881	10490	32.9	2669	35.1	10300	30.6769	10386	33.3	2957	33	9700	33.3271	9829	32	3004	31	8500	30
	Otherh	116	0.4	5	0.1	50	0.2	85	0.3	7	0.1	60	0.2	83	0.3	6	0.1	80	0.3	54	0.2	5	0	50	0.2
BED, BED human immunodeficiency virus 1 capture enzyme immunoassay
aAlabama, Arizona, Colorado, Connecticut, Florida, Indiana, Louisiana, Michigan, Mississippi, New Jersey, New York, North Carolina, South Carolina, Texas, Virginia, Washington
bChicago, Philadelphia
cEstimated numbers resulted from statistical adjustment that accounted for reporting delays and missing risk-factor information, but not for incomplete reporting.
dNumbers do not count individuals diagnosed with AIDS at or within 6 months after human immunodeficiency virus diagnosis; these were risk redistributed but not adjusted for reporting delay
eBecause column totals for estimated numbers were calculated independently of the values for the subpopulations, the values in each column may not sum to the column total.
fHispanics/Latinos can be of any race
gHeterosexual contact with a person known to have, or to be at high risk for, HIV infection.
hIncludes hemophilia, blood transfusion, perinatal exposure, and risk factor not reported or not identified.
